# Supplementary material
Source: PubMed Central journal article supplement (PMC8781217)

CODI Infrastructure Development Cross-Functional Flowchart

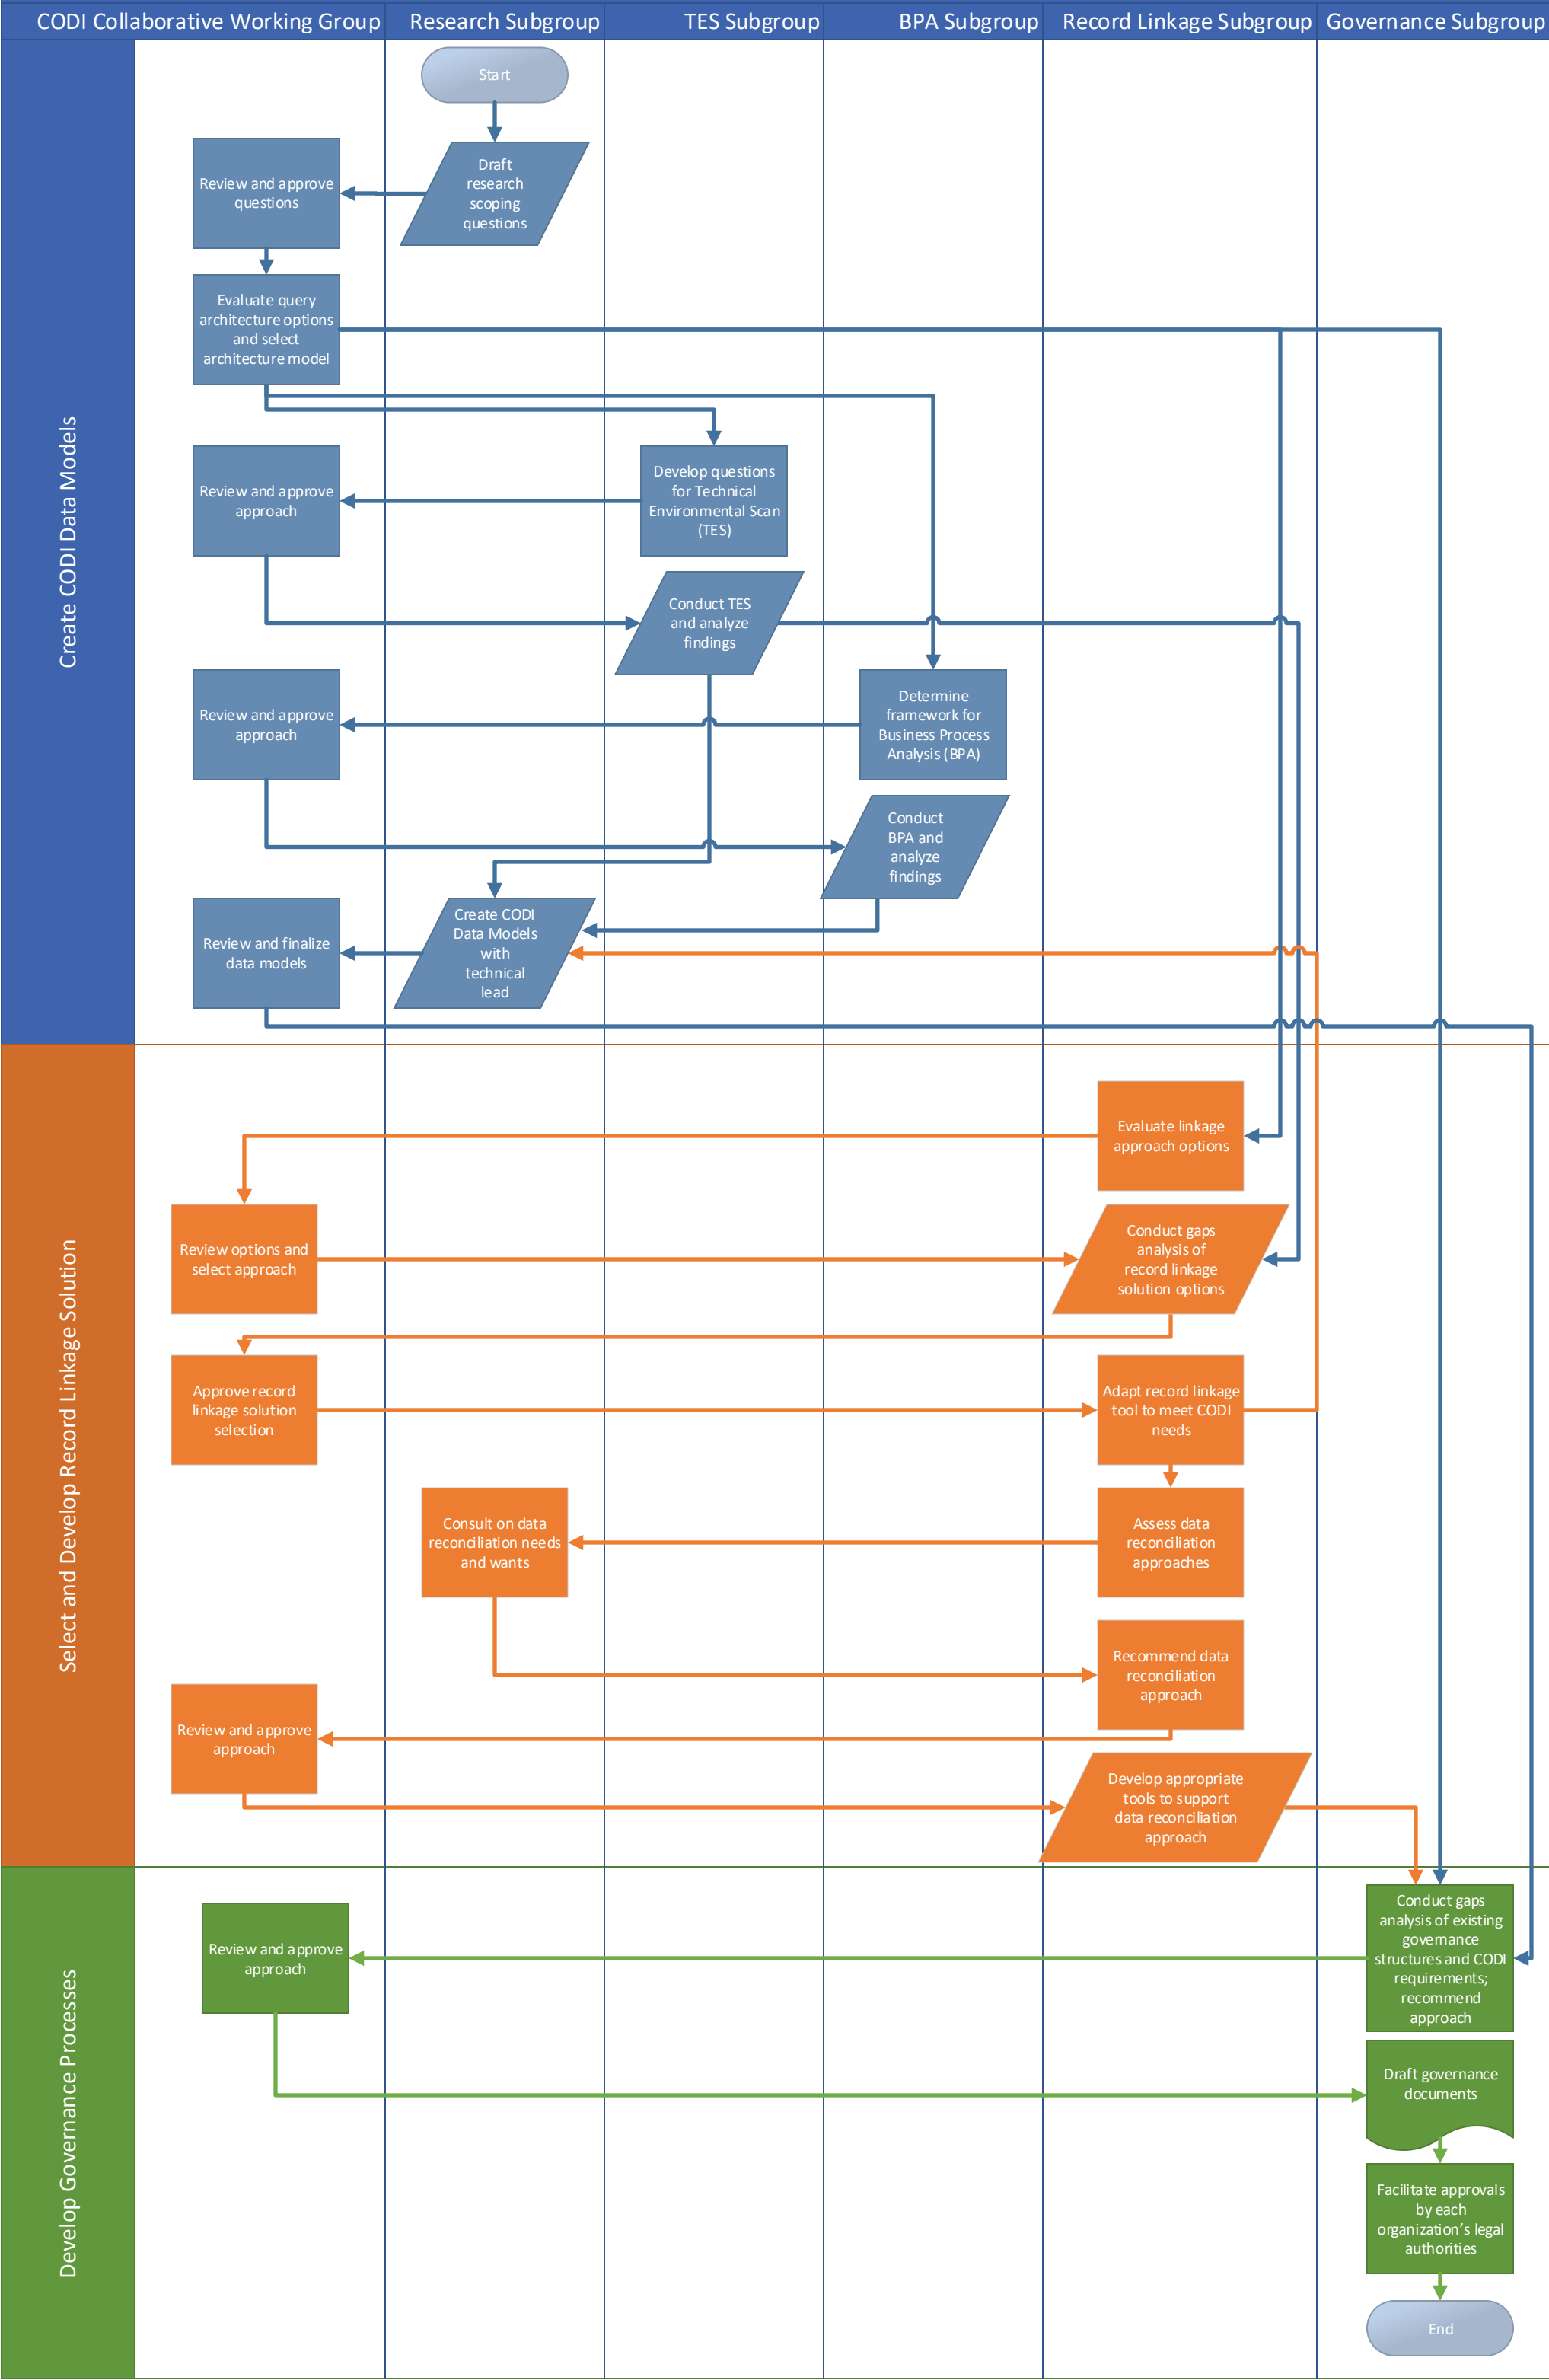

Supplement: jpump-28-e430-s001.pdf [file jpump-28-e430-s001.pdf]
